# Supplementary material
Source: PubMed Central journal article supplement (PMC5419496)
Supplement: 91file003.pdf [file 91file003.pdf]

## Supplementary Materials

### GeneImp: Fast Imputation to Large Reference Panels Using Genotype Likelihoods from Ultra-Low Coverage Sequencing

Athina Spiliopoulou, Marco Colombo, Peter Orchard, Felix Agakov, and Paul McKeigue

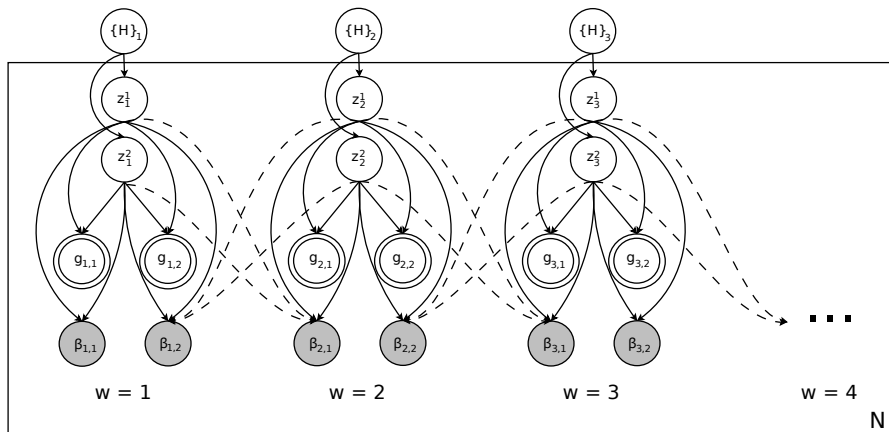

**Supplementary Figure 1. Probabilistic graphical model of GeneImp for 3 consecutive windows.** Each target sample is modelled independently of other target samples (denoted by the plate notation with  $N$  plates).  $\{H\}_w$  denotes the set of reference haplotype sequences at sites within window  $w$ . Double-circles denote deterministic nodes (Equation 3 in the main text). Gray nodes denote observed variables (e.g. sequencing reads). Dashed edges denote dependencies that are dropped in the factorised approximation of the joint distribution over hidden states (Equation 4 in the main text). We depict only two loci with reads ( $\beta_{w,1}$  and  $\beta_{w,2}$ ) in each window; in practice, this number is higher and varies among windows.
